# Supplementary material
Source: publisher figshare collection journal article supplement (https://rs.figshare.com/ndownloader/files/13001558)
Supplement: Supplementary file 1 [file 13001558]

species,family,site,dist.RG,dist.YB,dist.LUM,subjective.colour.classification,disperser(s),dispersal.syndrome.reference
Chassalia_ternifolia,Rubiaceae,RNP,0.000236028,0.06818552,0.258597631,red/purple,"bird, lemur","Razafindratsima & Dunham 2016, J. Ecol.; Atsalis 1999, Int. J. Primatol"
Clidemia_hirta,Melastomataceae,RNP,0.000349052,0.013432413,0.092891691,dark purple,bird,"Razafindratsima 2015, PhD thesis, Rice University"
Coptosperma_sp,Rubiaceae,RNP,0.009589322,0.030242032,0.066089605,brown,lemur,"Razafindratsima & Dunham 2016, J. Ecol.; Razafindratsima 2015, PhD thesis, Rice University"
Cryptocaria_crassifolia,Lauraceae,RNP,0.046039591,0.014507076,0.157819468,red/purple,"bird, lemur","Razafindratsima 2015, PhD thesis, Rice University"
Cryptocaria_sp,Lauraceae,RNP,0.01906708,0.103689872,0.068486637,brown/orange,lemur,"Razafindratsima 2015, PhD thesis, Rice University"
Eugenia_sp,Myrtaceae,RNP,0.018085453,0.151956224,0.223285442,yellow,lemur,"Razafindratsima & Dunham 2016, J. Ecol.; Razafindratsima 2015, PhD thesis, Rice University"
Ficus_botryoides,Moraceae,RNP,0.008902923,0.001565403,0.082831078,brown,lemur,"Razafindratsima & Dunham 2016, J. Ecol.; Razafindratsima 2015, PhD thesis, Rice University"
Ficus_lutea,Moraceae,RNP,0.011638226,0.009068743,0.041792786,red,"bird, lemur","Razafindratsima & Dunham 2016, J. Ecol.; Razafindratsima 2015, PhD thesis, Rice University; Dowsett-Lemaire 1988, Rev. Ecol.; Daru et al. 2015, Malimbus"
Ficus_politoria,Moraceae,RNP,0.025762875,0.103657714,0.271227301,red,"bird, lemur","Razafindratsima & Dunham 2016, J. Ecol.; Razafindratsima 2015, PhD thesis, Rice University"
Ficus_reflexa,Moraceae,RNP,0.00871654,0.008039204,0.05836332,red/purple,"bird, lemur","Razafindratsima & Dunham 2016, J. Ecol.; Razafindratsima 2015, PhD thesis, Rice University; Martin et al. 2009, Biodivers. Conserv."
Ficus_triifolia,Moraceae,RNP,0.005316833,0.083054429,0.236706559,greenish-reddish,lemur,"Razafindratsima & Dunham 2016, J. Ecol.; Razafindratsima 2015, PhD thesis, Rice University"
Garcinia_sp1,Clusiaceae,RNP,0.006315392,0.122408412,0.160887853,Two-sided: reddish (modeled) and greenish,lemur,"Razafindratsima & Dunham 2016, J. Ecol.; Razafindratsima 2015, PhD thesis, Rice University"
Macaranga_myreiolepida,Euphorbiaceae,RNP,0.00651126,0.030021671,0.082322729,purple,bird,"Razafindratsima & Dunham 2016, J. Ecol.; Razafindratsima 2015, PhD thesis, Rice University; Dew & Wright 1998, Biotropica"
Micronycia_macrophylla,Anacardiaceae,RNP,0.005026431,0.019610337,0.039605323,red/purple,lemur,"Razafindratsima & Dunham 2016, J. Ecol.; Razafindratsima 2015, PhD thesis, Rice University"
Mussaenda_arcuata,Rubiaceae,RNP,0.017024632,0.136162207,0.05573163,yellow,lemur,"Razafindratsima 2015, PhD thesis, Rice University"
Noronhia_incuvifolius,Oleaceae,RNP,0.009009551,0.073191868,0.186210811,dark purple,lemur,"Razafindratsima & Dunham 2016, J. Ecol.; Razafindratsima 2015, PhD thesis, Rice University"
Oncostemum_botryoides,Primulaceae,RNP,0.009320806,0.019620413,0.057218278,light red/violet,lemur,"Razafindratsima & Dunham 2016, J. Ecol.; Razafindratsima 2015, PhD thesis, Rice University"
Oncostemum_nervosum,Primulaceae,RNP,0.036796767,0.043631021,0.121936088,red,"bird, lemur","Razafindratsima & Dunham 2016, J. Ecol.; Razafindratsima 2015, PhD thesis, Rice University; Dew & Wright 1998, Biotropica"
Piper_sp,Piperaceae,RNP,0.0312135,0.013188525,0.164440687,red,bird,"Razafindratsima 2015, PhD thesis, Rice University"
Polyscias_sp,Araliaceae,RNP,0.029144746,0.088313447,0.154038013,purple,"bird, lemur","Razafindratsima & Dunham 2016, J. Ecol.; Razafindratsima 2015, PhD thesis, Rice University"
Psidium_cattleianum,Myrtaceae,RNP,0.028922575,0.016995154,0.033028361,red/purple,lemur,"Razafindratsima & Dunham 2016, J. Ecol.; Razafindratsima 2015, PhD thesis, Rice University"
Psorospermum_androsaemifolium,Hypericaceae,RNP,0.024215511,0.077519238,0.024345965,orange,lemur,"Razafindratsima & Dunham 2016, J. Ecol.; Razafindratsima 2015, PhD thesis, Rice University"
Psychotria_sp,Rubiaceae,RNP,0.018570371,0.003459227,0.151964289,red,"bird, lemur","Razafindratsima & Dunham 2016, J. Ecol.; Razafindratsima 2015, PhD thesis, Rice University"
Pyrostria_sp,Rubiaceae,RNP,0.017574432,0.012116131,0.128265246,brown/red,lemur,"Razafindratsima & Dunham 2016, J. Ecol.; Razafindratsima 2015, PhD thesis, Rice University"
Syzygium_emirnese,Myrtaceae,RNP,0.005634398,0.127142351,0.53138546,purple,lemur,"Razafindratsima & Dunham 2016, J. Ecol.; Razafindratsima 2015, PhD thesis, Rice University"
Tina_striata,Sapindaceae,RNP,0.008749459,0.006486657,0.125621606,yellow/orange,lemur,"Razafindratsima & Dunham 2016, J. Ecol.; Razafindratsima 2015, PhD thesis, Rice University"
Weinmannia_rutenbergii,Anacardiaceae,RNP,0.000436729,0.004826725,0.132808624,whitish,lemur,"Razafindratsima & Dunham 2016, J. Ecol.; Razafindratsima 2015, PhD thesis, Rice University"
Zanthoxylum_madagascariensis,Rutaceae,RNP,0.005402672,0.027023073,0.030293459,whitish,"bird, lemur","Razafindratsima & Dunham 2016, J. Ecol."
Aframomum_sp,Zingiberaceae,KNP,0.042177304,0.023810016,0.223326576,red,catarrhine,"Potts et al. 2011, Int. J. Primatol"
Allophylus_dumerii,Sapindaceae,KNP,0.071724331,0.028036164,0.226781453,pale orange,bird,"Valenta, Unpublished data"
Aningeria_altissima,Sapotaceae,KNP,0.060469895,0.001895018,0.107463922,green,"bird, catarrhine","Valenta, Unpublished data; Potts et al. 2011, Int. J. Primatol"
Balanites_wilsoniana,Zygophyllaceae,KNP,0.140290172,0.00436409,0.156907488,brownish green,elephant,"Chapman et al. 1992, J Trop Ecol"
Casearia_sp,Salicaceae,KNP,0.108327829,0.024526017,0.133833715,pale yellow,"bird, catarrhine","Valenta, Unpublished data"
Celtis_durandii,Cannabaceae,KNP,0.243723377,0.055328309,0.053311328,pale yellow,"bird, catarrhine","Potts et al. 2011, Int. J. Primatol; Obua 1992, MSc thesis, Makerere University"
Chaetachme_aristata,Ulmaceae,KNP,0.012646162,0.005957709,0.247248287,yellowish brown,catarrhine,"Potts et al. 2011, Int. J. Primatol"
Clausena_anisata,Rutaceae,KNP,0.139813105,0.002147717,0.362462864,purple,"bird, catarrhine","Valenta, Unpublished data"
Cordia_abyssinica,Boraginaceae,KNP,0.16120995,0.022706677,0.10470894,yellowish orange,"bird, catarrhine","Potts et al. 2011, Int. J. Primatol; Obua 1992, MSc thesis, Makerere University"
Cordia_millenii,Boraginaceae,KNP,0.256604758,0.025234919,0.096965797,yellowish brown,"bird, catarrhine","Potts et al. 2011, Int. J. Primatol; Obua 1992, MSc thesis, Makerere University"
Craterispermum_sp,Rubiaceae,KNP,0.313912324,0.007120451,0.351661689,blackish purple,"bird, catarrhine","Valenta, Unpublished data"
Cucumis_sp,Cucurbitaceae,KNP,0.07039266,0.001628554,0.113243399,green ,"elephant, catarrhine","Valenta, Unpublished data; Chapman, unpublished data"
Diplocyclos_sp,Cucurbitaceae,KNP,0.09965446,0.023769017,0.167981393,orange with faint white stripes,bird,"Valenta, Unpublished data"
Dasylepis_eggelingi,Achariaceae,KNP,0.043362227,0.02618213,0.132492201,pinkish orange,catarrhine,"Bortolamiol et al. 2014, PLoS one"
Erythrina_abyssinica,Fabaceae,KNP,0.063282537,0.047135283,0.398844398,red and black,bird,"Valenta, Unpublished data"
Fagaropsis_angolensis,Rutaceae,KNP,0.050545033,0.007579903,0.37338267,brown/black,"bird, catarrhine","Valenta, Unpublished data; Kagoro-Rugunda & Hashimoto 2015, O. J. Ecol."
Ficus_brachylepsis,Moraceae,KNP,0.077208869,0.012387722,0.18159481,reddish brown,"bird, catarrhine","Potts et al. 2011, Int. J. Primatol; Obua 1992, MSc thesis, Makerere University"
Ficus_capensis,Moraceae,KNP,0.132535993,0.009946723,0.22641097, reddish brown,"bird, catarrhine","Valenta, Unpublished data; Potts et al. 2011, Int. J. Primatol"
Ficus_cyathistipula,Moraceae,KNP,0.058220897,0.007632509,0.074700587,reddish,"bird, catarrhine","Potts et al. 2011, Int. J. Primatol; Obua 1992, MSc thesis, Makerere University"
Ficus_dawei,Moraceae,KNP,0.115615937,0.028704789,0.075817765,reddish orange  ,"bird, catarrhine","Potts et al. 2011, Int. J. Primatol; Obua 1992, MSc thesis, Makerere University"
Ficus_exasperata,Moraceae,KNP,0.111445372,0.010024098,0.063451922,greenish brown,"bird, catarrhine","Potts et al. 2011, Int. J. Primatol; Obua 1992, MSc thesis, Makerere University"
Ficus_mucuso,Moraceae,KNP,0.055613117,0.018425204,0.216718354,yellowish brown,"bird, catarrhine","Valenta, Unpublished data; Potts et al. 2011, Int. J. Primatol"
Ficus_natalensis,Moraceae,KNP,0.053440044,0.007313237,0.170558489,reddish orange or yellowish brown,"bird, catarrhine","Potts et al. 2011, Int. J. Primatol; Obua 1992, MSc thesis, Makerere University"
Ficus_urcellaris,Moraceae,KNP,0.119136334,0.037419394,0.149541326,yellowish green,"bird, catarrhine","Valenta, Unpublished data; Potts et al. 2011, Int. J. Primatol"
Ficus_vallis,Moraceae,KNP,0.023854286,0.023810502,0.253275036,yellowish orange,"bird, catarrhine","Potts et al. 2011, Int. J. Primatol; Obua 1992, MSc thesis, Makerere University"
Tinospora_sp,Menispermaceae,KNP,0.141034675,0.042687192,0.144169565,reddish orange,bird,"Valenta, Unpublished data"
Marantochloa_sp,Marantaceae,KNP,0.222098503,0.063788678,0.060415628,red,catarrhine,"Krief 2003, PhD thesis, Museum national d'histoire naturelle-MNHN PARIS"
Mimusops_bagshawei,Sapotaceae,KNP,0.060844817,0.057831325,0.346501577,yellowish orange,"bird, catarrhine","Potts et al. 2011, Int. J. Primatol; Obua 1992, MSc thesis, Makerere University"
Maytenus_sp, Celastraceae,KNP,0.054376656,0.099666568,0.952242214,red and white,"bird, catarrhine","Valenta, Unpublished data"
Piper_guineense,Piperaceae,KNP,0.130306018,0.052623992,0.171027708,red,"bird, catarrhine","Potts et al. 2011, Int. J. Primatol; Fl�rchinger et al. 2010, Oecologia"
Pleiocarpa_sp,Apocynaceae,KNP,0.211367291,0.017726152,0.081557512,yellow,catarrhine,"Kagoro-Rugunda & Hashimoto 2015, O. J. Ecol."
Polia_sp,Commelinaceae,KNP,0.01539438,0.000512526,0.341957088,bright blue/purple,bird,"Vignolini et al. 2012, PNAS"
Prunus_africana,Rosaceae,KNP,0.070888149,0.00525264,0.390056978,reddish brown,"bird, catarrhine","Potts et al. 2011, Int. J. Primatol; Farwig et al. 2006, Oecologia"
Pseudospondias_microcarpa,Anacardiaceae,KNP,0.036419497,0.009721978,0.235991233,red or blueish black,"bird, catarrhine","Potts et al. 2011, Int. J. Primatol; Paul 2001, MSc thesis, University of Florida"
Rothmannia_urcelliformis,Rubiaceae,KNP,0.164860541,0.004015155,0.071296884,blackish,catarrhine,"Krief et al. 2006, Am. J. Primatol.; Krief 2003, PhD thesis, Museum national d'histoire naturelle-MNHN PARIS"
Solanum_sp,Solanaceae,KNP,0.061861002,0.013697407,0.249231547,yellowish orange,"bird, catarrhine","Krief 2003, PhD thesis, Museum national d'histoire naturelle-MNHN PARIS; Witkowski & Garner 2008, S. Afr. J. Bot."
Strombosia_sp,Olacaceae,KNP,0.17393174,0.004361698,0.127077377,green,"bird, catarrhine","Chapman, unpublished data; Paul 2001, MSc thesis, University of Florida"
Syzygium_sp,Myrtaceae,KNP,0.048075009,0.002187624,0.316021471,purple,catarrhine,"Valenta, Unpublished data"
Tabernaemontana_conophrangia,Apocynaceae,KNP,0.058692405,0.006855524,0.182084916,brownish green,catarrhine,"Potts et al. 2009, J. Animal. Ecol"
Teclea_nobilis,Rutaceae,KNP,0.230637016,0.066688627,0.063823183,red,"bird, catarrhine","Potts et al. 2011, Int. J. Primatol; Obua 1992, MSc thesis, Makerere University"
Turraea_sp,Meliaceae,KNP,0.055527411,0.001015531,0.068597012,whitish green,bird,"Valenta, Unpublished data"
Toddalia_asiatica,Rutaceae,KNP,0.176809686,0.024960427,0.867547502,orange,catarrhine,"Valenta, Unpublished data"
Euadenia_eminens,Capparaceae,KNP,0.174344339,0.004112218,0.107454229,yellowish orange,catarrhine,"Bortolamiol et al. 2014, PLoS one"
Uvariopsis_congensis,Annonaceae,KNP,0.031960836,0.029925797,0.279895123,reddish orange,"bird, catarrhine","Potts et al. 2011, Int. J. Primatol; Paul 2001, MSc thesis, University of Florida"
